# Supplementary material for: Identification and Functional Analysis of Drought-Responsive Long Noncoding RNAs in Maize Roots
Source: MDPI journal article supplement (doi:10.3390/ijms242015039), 2023-10-10
Supplement: s1 [file s1]

## Supplementary Figures

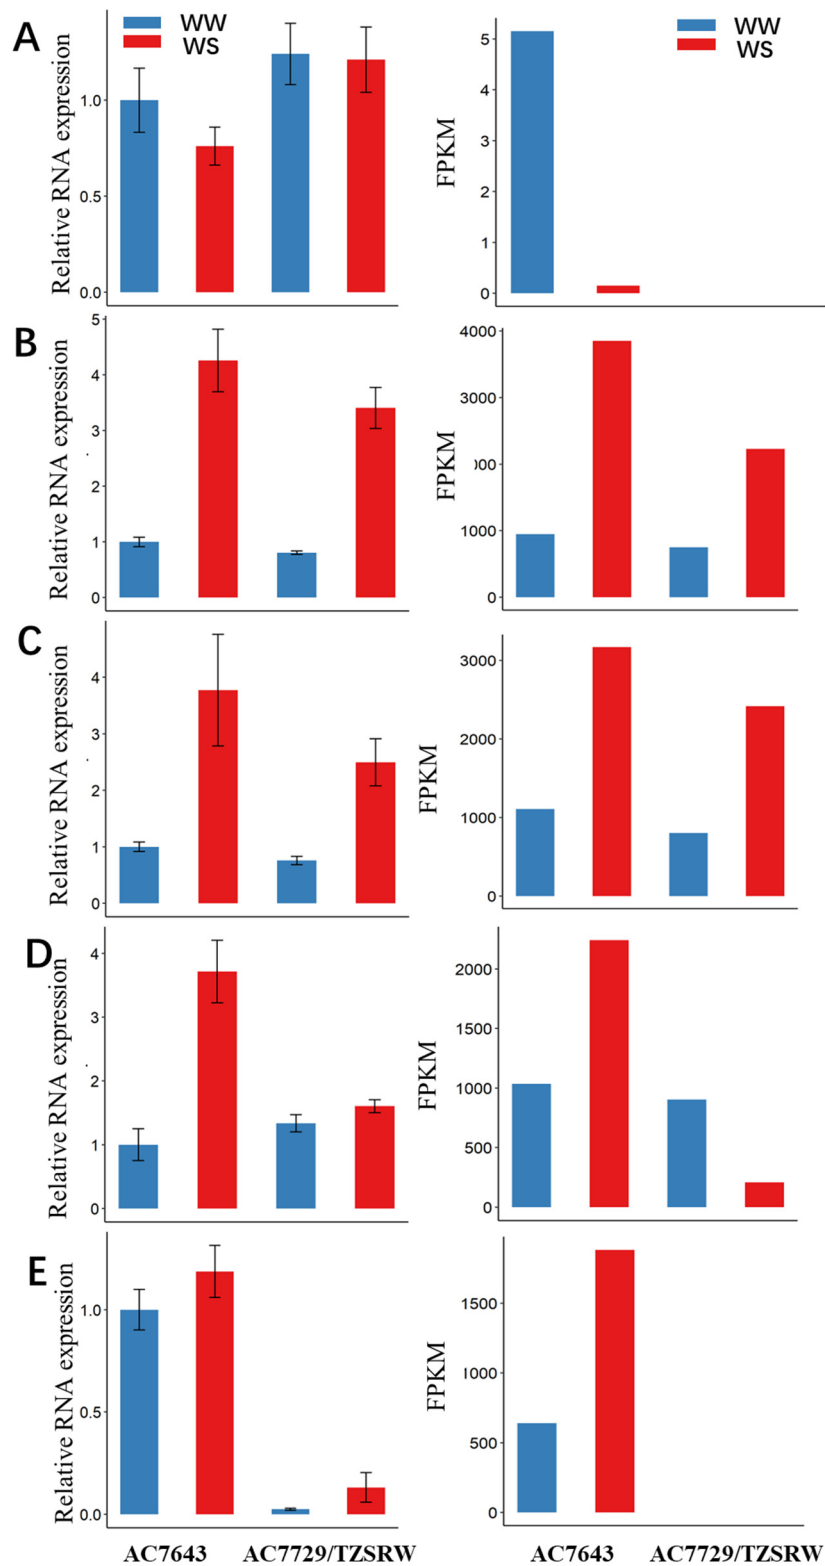

**Supplementary Figure S1.** The relative expression (Left) and FPKM (Right) of lncRNAs in different drought-tolerant materials (AC7643 and AC7729/TZSRW) under different water conditions (WW and WS). A : XLOC\_007641, B: XLOC\_032450, C: XLOC\_017628, D: XLOC\_027965, E: XLOC\_028529.

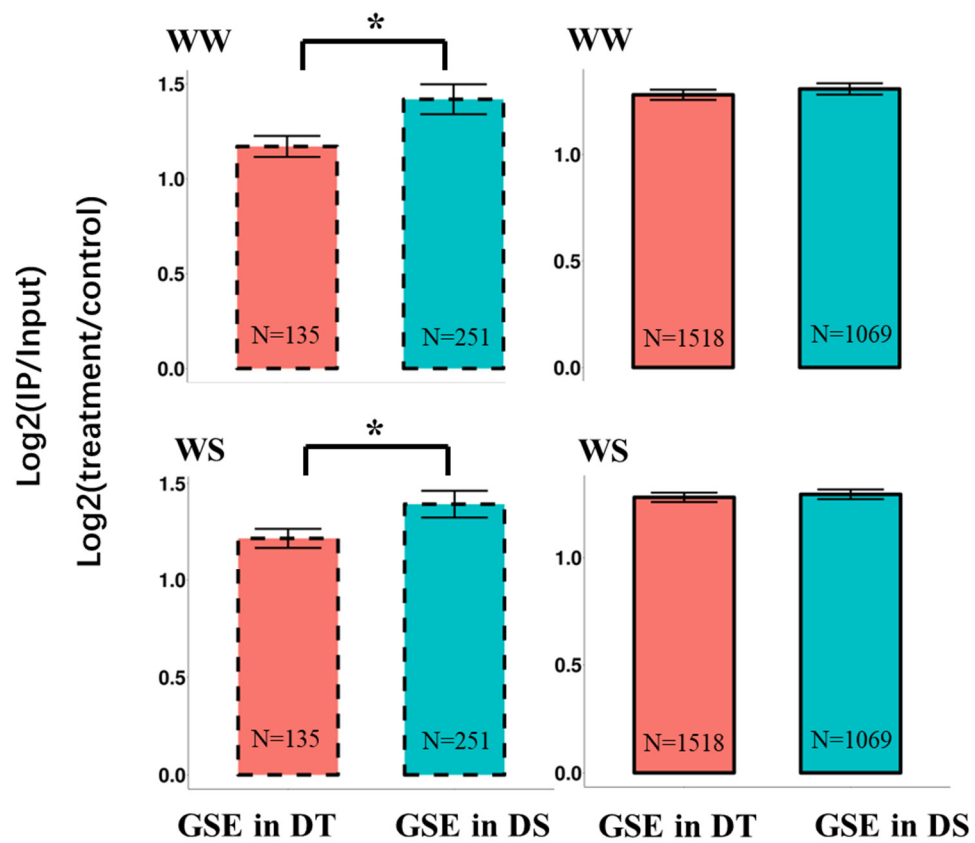

**Supplementary Figure S2.** The reads of H3K9AC modification at the genes specifically expressed in different drought resistant inbred lines under WW and WS. GSE in DT, genes specifically expressed in drought-tolerant inbred lines. GSE in DS, genes specifically expressed in drought-sensitive inbred lines. WW, well-watered; WS, water-stressed. \*,  $p < 0.05$ .
